# Supplementary material
Source: Elsevier journal article supplement (https://www.sciencedirect.com/science/article/pii/S0300893220302451)
Supplement: mmc1 [file S0300893220302451:mmc1.pdf]

## **SUPPLEMENTARY MATERIAL**

### **Non-inferiority of heart failure nurse titration vs heart failure cardiologist titration. ETIFIC multicentre randomized trial**

#### **ETIFIC research team group**

**Collaborators:** The authors acknowledge all other members of the ETIFIC research team, collaborators, who took part in the study and reviewed the study protocol, developed the intervention content, obtained ethical approval of each hospital, managed the day-today running of the trial and delivery of the intervention and collected the data:

Ascensión Martín, Josep Roca, Cristina Enjuanes, Laia Rosenfeld, Marta Marichal, Arola Armengou, Pilar Ruiz-Rodríguez, Anna Linas, M-José Bernardo, Beatriz Díaz-Molina, José-Luis Lambert, Josefa González-Ordás, Amada Recio, Luis de-la-Fuente, Rebeca Sancho, Ana Correa, Carmen Bravo, Anna Arce, Ramón Bascompte, Mercè Faraudo, Paola Beltrán, Rosario Gracia-Ródenas, Francisco José Pastor-Pérez, Concepción Fernández-Redondo, Amparo Martínez-López, Marta Cobo-Marcos, Gracia López-Moyano, Carmen Duran, Concepción Recuerda, Gustavo Cortez, Carmen Rus, Ángela Ortega-López, Inés Gómez-Otero, Ana Seoane-Blanco, Montserrat Puga, Silvia López-Fernández, Mercedes González-de-Molina, Luis Almenar, Inmaculada Husillos, Raquel López, Patricia Conejero, Pilar Iglesias, Ramón Bover, Alberto Esteban, Mónica Pérez, Alberto Giráldez, Patricia Atalaya, Carmen Larraondo, Ana López-Rodríguez, Manolo Gómez-Bueno, María Molina-Jiménez, Beatriz González-Fernández, Josefa Pérez-Romero, Beatriz Fernández-González, Leticia Napal, Jesús Berjón.

**Contributors:** The authors as well as collaborators are members of the ETIFIC research team. Among them, there are HF Cardiologists, HF Nurses, Directors of HF and Cardiac Transplant Units, Directors of Departments of Cardiology and also Medical Directors. They have large experience and expertise in managing HF patients and have taken part in several research studies on chronic and acute HF and cardiac transplant. It is difficult to explain this previous large expertise and research work in a short paragraph. In line with Cardiology

Societies all over the world, the ETIFIC team believes that there is an urgent need to deepen the knowledge on organizational issues in order to improve the implementation of HF guidelines.

**Authors (Steering Committee):** J. Oyanguren, Ll. García-Garrido, M. Nebot-Margalef, P. Latorre-García, I. Lekuona, J. Torcal-Laguna, J. Comín -Colet, J. Roure, J. González-Costello, N. Manito, J.M. García-Pinilla, Y. Sánchez-Paule, A. Varela-Román, M. Moure, J. Segovia-Cubero, T. Soria. All authors had full access to all of the data (including statistical reports and tables) in the study and can take responsibility for the integrity of the data and the accuracy of the data analysis. All authors approved the final version of this manuscript. JO is the guarantor. The corresponding author attests that all listed authors meet authorship criteria and that no others meeting the criteria have been omitted.

**Acknowledgments:** We thank the Departments of Cardiology and Health Administrators of the 20 hospitals who took part in this study:

Galdakao HU- Barrualde; Bellvitge HU; Dr. Josep Trueta HU; Del Mar HU; Burgos HU; Asturias HU; Germans Trias i Pujol HU; Valladolid H U; Navarra HU; Santa María-Lleida HU; Moisés Broggi H; Virgen de la Arrixaca HU; Puerta de Hierro HU; Andújar H; Virgen de la Victoria HU; Santiago HU; Virgen de las Nieves HU; La Fe de Valencia HU; San Carlos HU; Jerez HU.

\*Hospital (H), University (U).

**Ethical approval:** The study was approved by the Clinical Research Ethics Committee of the Basque Country, ETIFIC JOA-ARA 2014- 01 (PI 14/01208), 17/12/2014, and the Ethics Committees of each hospital (20). Written informed consent was requested. This study complies with the Declaration of Helsinki.

**Transparency:** The lead author affirms that the manuscript is an honest, accurate, and transparent account of the study being reported; that no important aspects of the study have been omitted; and that any discrepancies from the study as planned and registered have been explained.

**The protocol** was published previously in the ESC Heart Failure Journal 2017; 4:507-519.

<https://onlinelibrary.wiley.com/doi/10.1002/ehf2.12152>
